# Supplementary material for: COVID-19 Vaccine Acceptance Rate and Its Factors among Healthcare Students: A Systematic Review with Meta-Analysis
Source: MDPI journal article supplement (doi:10.3390/vaccines10050806), 2022-05-19
Supplement: s1 [file s1]

Table S1. Quality assessment of included studies.

| SL | Author                                                            | Country         | 1. Were the Criteria for Inclusion in the Sample Clearly Defined? | 2. Were the Study Subjects and the Setting Described in Detail? | 3. Was the Exposure Measured in a Valid and Reliable Way? | 4. Were Objective, Standard Criteria Used for Measurement of the Condition? | 5. Were Confounding Factors Identified? | 6. Were Strategies to Deal with Confounding Factors Stated? | 7. Were the Outcomes Measured in a Valid and Reliable Way? | 8. Was Appropriate Statistical Analysis Used? | Quality Level (High: $\geq 50\%$ ; Low: $< 50\%$ ) |
|----|-------------------------------------------------------------------|-----------------|-------------------------------------------------------------------|-----------------------------------------------------------------|-----------------------------------------------------------|-----------------------------------------------------------------------------|-----------------------------------------|-------------------------------------------------------------|------------------------------------------------------------|-----------------------------------------------|----------------------------------------------------|
| 1  | Al Janabi et al.<br>(Al Janabi et al., 2021)                      | USA             | 1                                                                 | 1                                                               | 1                                                         | 1                                                                           | 0                                       | 0                                                           | 0                                                          | 1                                             | High                                               |
| 2  | Bălan et al.<br>(Bălan et al., 2021)                              | Romania         | 1                                                                 | 1                                                               | 1                                                         | 1                                                                           | 0                                       | 0                                                           | 1                                                          | 1                                             | High                                               |
| 3  | Belingheri et al.<br>(Belingheri et al., 2021)                    | Ialy            | 1                                                                 | 1                                                               | 1                                                         | 1                                                                           | 1                                       | 0                                                           | 1                                                          | 1                                             | High                                               |
| 4  | Bolatov et al.<br>(Bolatov et al., 2021)                          | Kazakh-<br>stan | 1                                                                 | 1                                                               | 1                                                         | 1                                                                           | 0                                       | 0                                                           | 1                                                          | 1                                             | High                                               |
| 5  | De Sousa<br>Chaves et al.<br>(De Sousa<br>Chaves et al.,<br>2021) | Brazil          | 1                                                                 | 1                                                               | 0                                                         | 1                                                                           | 0                                       | 0                                                           | 1                                                          | 1                                             | High                                               |
| 6  | Gao et al. (Gao<br>et al., 2021)                                  | China           | 1                                                                 | 1                                                               | 1                                                         | 1                                                                           | 0                                       | 0                                                           | 1                                                          | 1                                             | High                                               |

|    |                                                     |        |   |   |   |   |   |   |   |   |      |
|----|-----------------------------------------------------|--------|---|---|---|---|---|---|---|---|------|
| 7  | Gotlib et al.<br>(Gotlib et al., 2021)              | Poland | 1 | 1 | 0 | 1 | 0 | 0 | 1 | 1 | High |
| 8  | Grochowska et al. (Grochowska et al., 2021)         | Poland | 1 | 1 | 0 | 1 | 0 | 0 | 1 | 0 | High |
| 9  | Jain et al. (J. Jain, Saurabh, Kumar, et al., 2021) | India  | 1 | 1 | 1 | 1 | 0 | 0 | 0 | 1 | High |
| 10 | Jiang et al. (Jiang et al., 2021)                   | China  | 1 | 1 | 1 | 1 | 0 | 0 | 0 | 1 | High |
| 11 | Kanyike et al. (Kanyike et al., 2021)               | Uganda | 1 | 1 | 0 | 1 | 0 | 0 | 0 | 1 | High |
| 12 | Katz et al. (Katz et al., 2021)                     | Israel | 1 | 1 | 0 | 1 | 0 | 0 | 1 | 1 | High |
| 13 | Kelekar et al. (Kelekar et al., 2021)               | USA    | 1 | 1 | 1 | 1 | 0 | 0 | 1 | 1 | High |
| 14 | (L. Jain et al., 2021)                              | India  | 1 | 1 | 0 | 1 | 0 | 0 | 1 | 1 | High |
| 15 | Li et al. (Li, Zheng, et al., 2021)                 | China  | 1 | 1 | 0 | 1 | 0 | 0 | 1 | 1 | High |

|    |                                                           |          |   |   |   |   |   |   |   |   |      |
|----|-----------------------------------------------------------|----------|---|---|---|---|---|---|---|---|------|
| 16 | Lindner-Pawłowicz et al. (Lindner-Pawłowicz et al., 2021) | Poland   | 1 | 1 | 0 | 1 | 0 | 0 | 0 | 1 | High |
| 17 | Liucia et al. (Lucia et al., 2020)                        | Italy    | 1 | 1 | 0 | 1 | 0 | 0 | 0 | 1 | High |
| 18 | Lo Moro et al. (Lo Moro et al., 2022)                     | USA      | 1 | 1 | 1 | 1 | 0 | 0 | 1 | 1 | High |
| 19 | Mahdi (Mahdi, 2021)                                       | Iraq     | 1 | 1 | 0 | 1 | 0 | 0 | 1 | 1 | High |
| 20 | Manning et al. (Manning et al., 2021)                     | USA      | 1 | 1 | 0 | 1 | 0 | 0 | 0 | 1 | High |
| 21 | Mascarenhas et al. (Mascarenhas et al., 2021)             | USA      | 1 | 1 | 1 | 1 | 0 | 0 | 1 | 1 | High |
| 22 | Mayan et al. (Mayan et al., 2021)                         | USA      | 1 | 1 | 1 | 1 | 0 | 0 | 0 | 1 | High |
| 23 | Mose et al. (Mose et al., 2022)                           | Ethiopia | 1 | 1 | 0 | 1 | 0 | 0 | 1 | 1 | High |

|    |                                                        |              |   |   |   |   |   |   |   |   |      |
|----|--------------------------------------------------------|--------------|---|---|---|---|---|---|---|---|------|
| 24 | Petravic et al.<br>(Petravić et al., Slovenia<br>2021) |              | 1 | 1 | 1 | 1 | 1 | 1 | 1 | 1 | High |
| 25 | Riad et al. (Riad et al., 2021)                        | 22 countries | 1 | 1 | 1 | 1 | 0 | 0 | 1 | 1 | High |
| 26 | Rosental and Shmueli<br>(Rosental & Shmueli, 2021)     | Israel       | 1 | 1 | 1 | 1 | 0 | 0 | 1 | 1 | High |
| 27 | Saied et al.<br>(Saied et al., 2021)                   | Egypt        | 1 | 1 | 0 | 1 | 0 | 0 | 0 | 1 | High |
| 28 | Szmyd et al.<br>(Szmyd et al., 2021)                   | Poland       | 1 | 1 | 0 | 1 | 0 | 0 | 0 | 1 | High |
| 29 | Talarek et al.<br>(Talarek et al., 2021)               | Poland       | 1 | 1 | 1 | 0 | 0 | 0 | 0 | 1 | High |
| 30 | Zhang et al.<br>(Zhang et al., 2022)                   | China        | 1 | 1 | 0 | 1 | 0 | 0 | 1 | 1 | High |
| 31 | Zhou et al.<br>(Zhou et al., 2021)                     | China        | 1 | 1 | 1 | 1 | 0 | 0 | 1 | 1 | High |

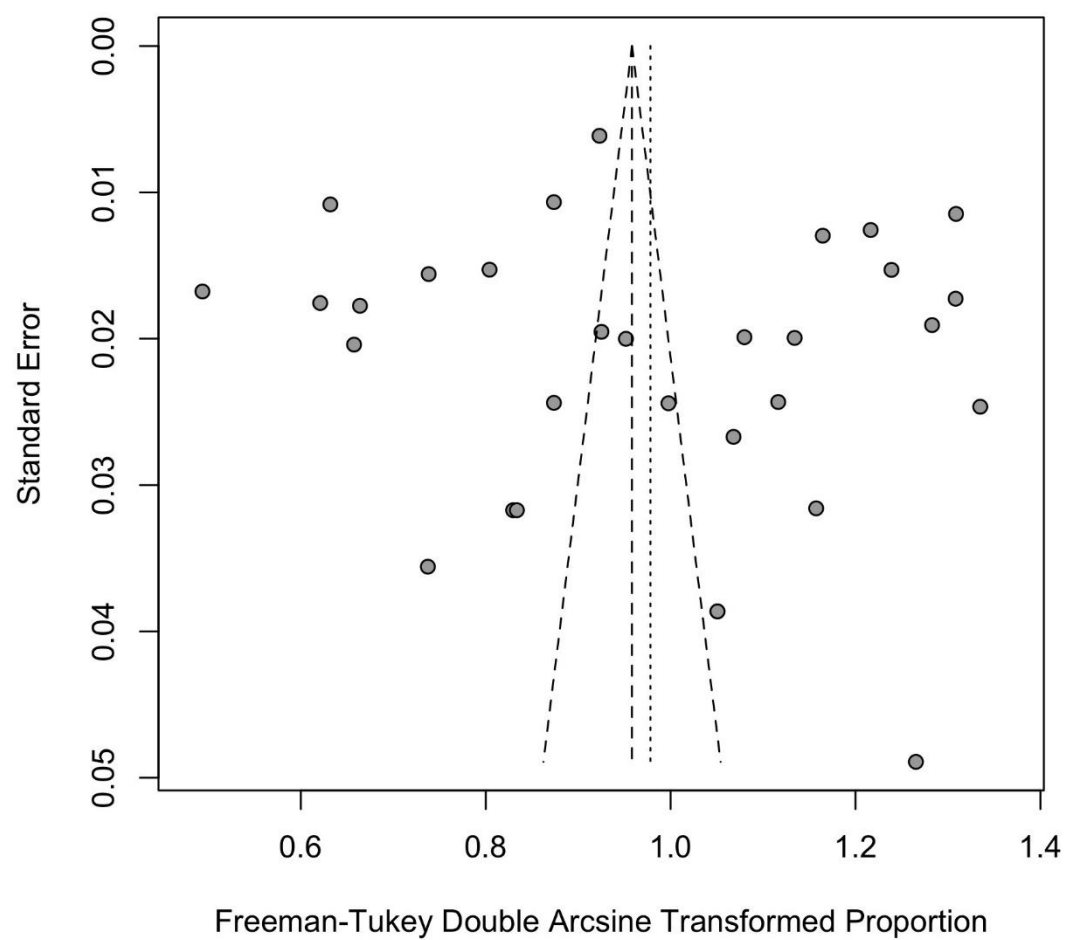

**Figure S1.** Funnel plot of vaccine acceptance among healthcare students.

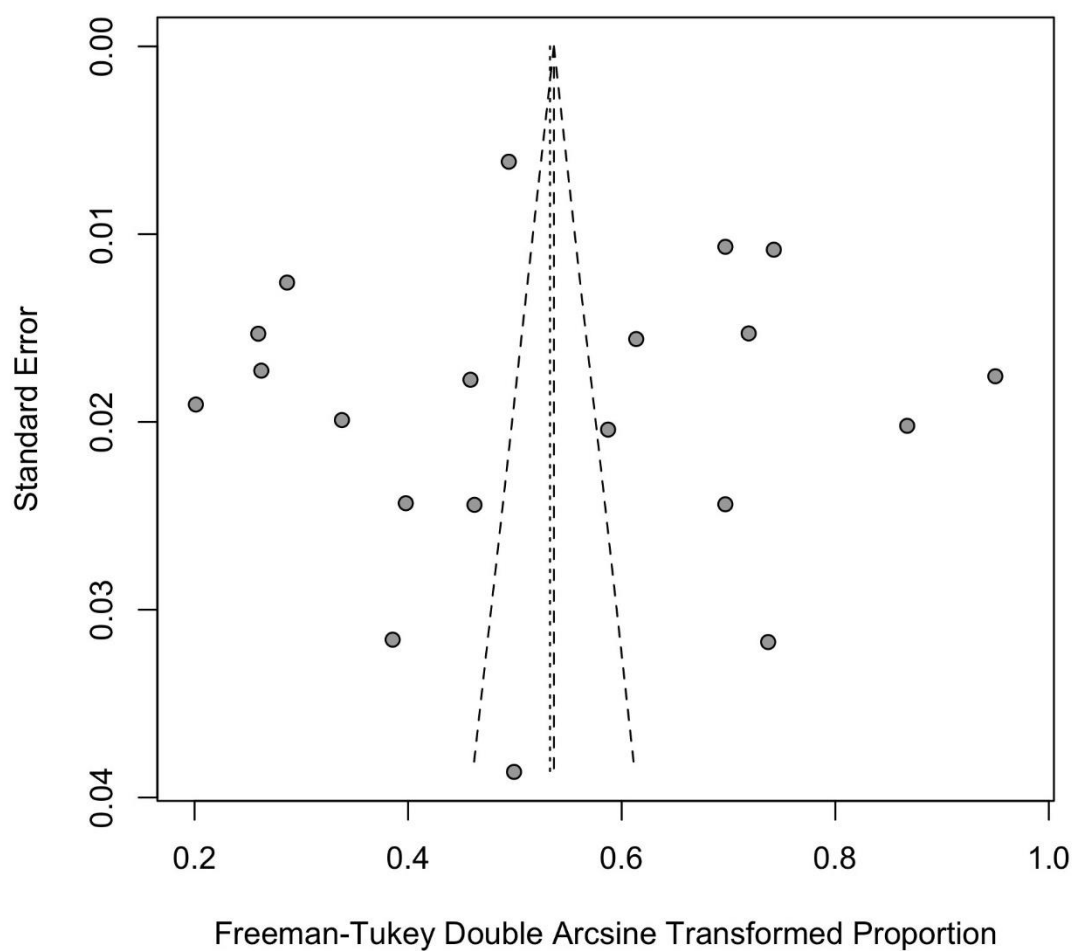

**Figure S2.** Funnel plot of vaccine hesitancy among healthcare students.
